# Supplementary material for: Sustainable Synthesis of Silver Nanoparticles Using Marine Algae for Catalytic Degradation of Methylene Blue
Source: MDPI journal article supplement (doi:10.3390/catal11111377), 2021-11-15
Supplement: s1 [file s1]

Archive with 1 entries (1 files):
- catalysts-1459489-supplementary.pdf
